# Supplementary material for: Enhanced Hydrogen Storage Properties of Li-RHC System with In-House Synthesized AlTi3 Nanoparticles
Source: MDPI journal article supplement (doi:10.3390/en14237853), 2021-11-23
Supplement: s1 [file s1]

Article

# Enhanced Hydrogen Storage Properties of Li-RHC System with In-House Synthesized AlTi<sub>3</sub> Nanoparticles

Thi-Thu Le <sup>1</sup>, Claudio Pistidda <sup>1,\*</sup>, Julián Puszkiet <sup>1,2</sup>, María Victoria Castro Riglos <sup>3</sup>, David Michael Dreistadt <sup>1</sup>, Thomas Klassen <sup>1,2</sup> and Martin Dornheim <sup>1,\*</sup>

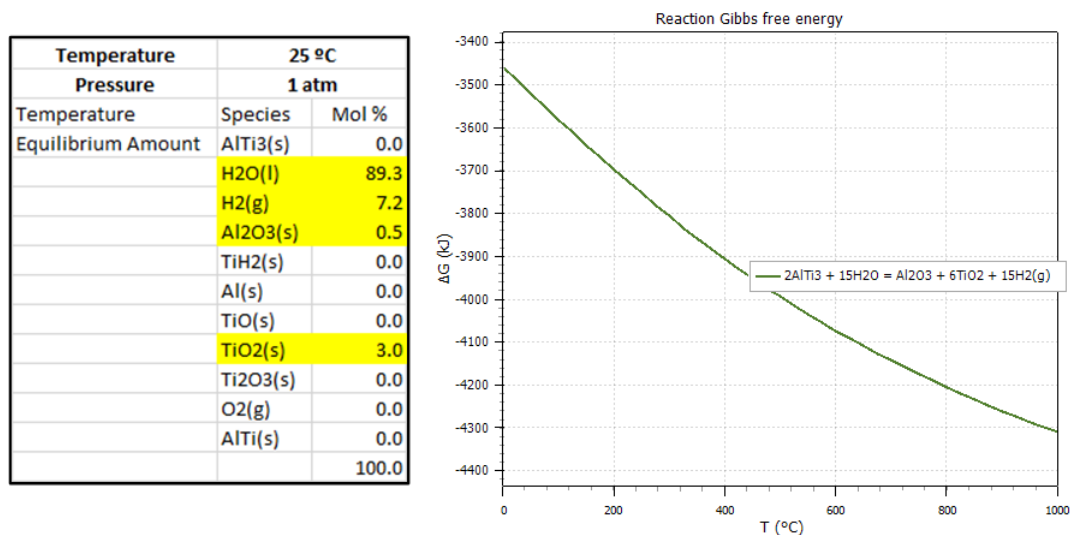

Figure S1. Gibbs minimization equilibrium calculations for the interaction between AlTi<sub>3</sub> and water.

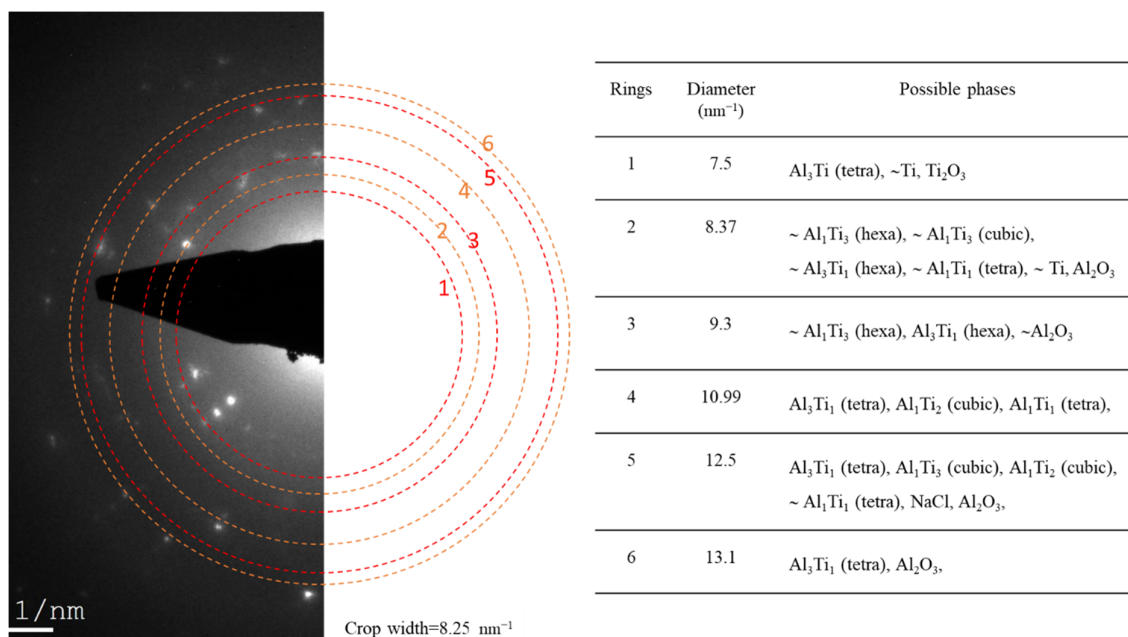

Figure S2. TEM diffraction of the mixture NaH + 3TiCl<sub>3</sub>·AlCl<sub>3</sub> after washing and drying and possible phases.

**Table S1.** Interplanar spacing mismatch (%) of possible close-packed plane pair between MgB<sub>2</sub> (ICSD 94255), AlTi<sub>3</sub> (ICSD 58188) and Al<sub>2</sub>O<sub>3</sub> (ICSD 73724).

| Matching pairs | $\{10\bar{1}1\}_{\text{MgB}_2} // \{20\bar{2}1\}_{\text{AlTi}_3}$ | $\{10\bar{1}1\}_{\text{MgB}_2} // \{20\bar{2}2\}_{\text{AlTi}_3}$ | $\{10\bar{1}1\}_{\text{MgB}_2} // \{20\bar{2}0\}_{\text{AlTi}_3}$         | $\{10\bar{1}0\}_{\text{MgB}_2} // \{20\bar{2}1\}_{\text{AlTi}_3}$         | $\{10\bar{1}0\}_{\text{MgB}_2} // \{20\bar{2}2\}_{\text{AlTi}_3}$   | $\{10\bar{1}0\}_{\text{MgB}_2} // \{20\bar{2}0\}_{\text{AlTi}_3}$ | $\{0002\}_{\text{MgB}_2} // \{20\bar{2}1\}_{\text{AlTi}_3}$ |
|----------------|-------------------------------------------------------------------|-------------------------------------------------------------------|---------------------------------------------------------------------------|---------------------------------------------------------------------------|---------------------------------------------------------------------|-------------------------------------------------------------------|-------------------------------------------------------------|
| $f_d$          | 3.53                                                              | -20                                                               | 17.6                                                                      | 17.5                                                                      | -36.3                                                               | -6.3                                                              | 27.6                                                        |
| Matching pairs | $\{0002\}_{\text{MgB}_2} // \{20\bar{2}2\}_{\text{AlTi}_3}$       | $\{0002\}_{\text{MgB}_2} // \{20\bar{2}0\}_{\text{AlTi}_3}$       | $\{10\bar{1}1\}_{\text{MgB}_2} // \{11\bar{2}0\}_{\text{Al}_2\text{O}_3}$ | $\{10\bar{1}0\}_{\text{MgB}_2} // \{11\bar{2}0\}_{\text{Al}_2\text{O}_3}$ | $\{0002\}_{\text{MgB}_2} // \{11\bar{2}0\}_{\text{Al}_2\text{O}_3}$ |                                                                   |                                                             |
| $f_d$          | 3.33                                                              | 42.2                                                              | 17.6                                                                      | -11.1                                                                     | 35.1                                                                |                                                                   |                                                             |

**Table S2.** Interatomic spacing misfit (%) of possible matching directions between MgB<sub>2</sub> (a = 3.085 Å, c = 3.521 Å), AlTi<sub>3</sub> (a = 5.78 Å, c = 4.647 Å) and Al<sub>2</sub>O<sub>3</sub> (a = 4.754 Å, c = 12.982 Å).

| Matching pairs | $\langle 11\bar{2}0 \rangle_{\text{MgB}_2} // \langle 11\bar{2}0 \rangle_{\text{AlTi}_3}$ | $\langle 11\bar{2}3 \rangle_{\text{MgB}_2} // \langle 10\bar{1}0 \rangle_{\text{AlTi}_3}$ | $\langle 11\bar{2}3 \rangle_{\text{MgB}_2} // \langle 11\bar{2}3 \rangle_{\text{AlTi}_3}$ | $\langle 11\bar{2}3 \rangle_{\text{MgB}_2} // \langle 0001 \rangle_{\text{AlTi}_3}$ | $\langle 10\bar{1}0 \rangle_{\text{MgB}_2} // \langle 10\bar{1}0 \rangle_{\text{AlTi}_3}$         | $\langle 10\bar{1}0 \rangle_{\text{MgB}_2} // \langle 11\bar{2}3 \rangle_{\text{AlTi}_3}$ |
|----------------|-------------------------------------------------------------------------------------------|-------------------------------------------------------------------------------------------|-------------------------------------------------------------------------------------------|-------------------------------------------------------------------------------------|---------------------------------------------------------------------------------------------------|-------------------------------------------------------------------------------------------|
| $f_s$          | 46.6                                                                                      | 19                                                                                        | 58.4                                                                                      | -0.73                                                                               | 36.9                                                                                              | 58.4                                                                                      |
| Matching pairs | $\langle 10\bar{1}0 \rangle_{\text{MgB}_2} // \langle 0001 \rangle_{\text{AlTi}_3}$       | $\langle 0001 \rangle_{\text{MgB}_2} // \langle 10\bar{1}0 \rangle_{\text{AlTi}_3}$       | $\langle 0001 \rangle_{\text{MgB}_2} // \langle 11\bar{2}3 \rangle_{\text{AlTi}_3}$       | $\langle 0001 \rangle_{\text{MgB}_2} // \langle 0001 \rangle_{\text{AlTi}_3}$       | $\langle 11\bar{2}0 \rangle_{\text{MgB}_2} // \langle 10\bar{1}0 \rangle_{\text{Al}_2\text{O}_3}$ |                                                                                           |
| $f_s$          | 33.6                                                                                      | 39.1                                                                                      | 52.5                                                                                      | 24.2                                                                                | 35.1                                                                                              |                                                                                           |

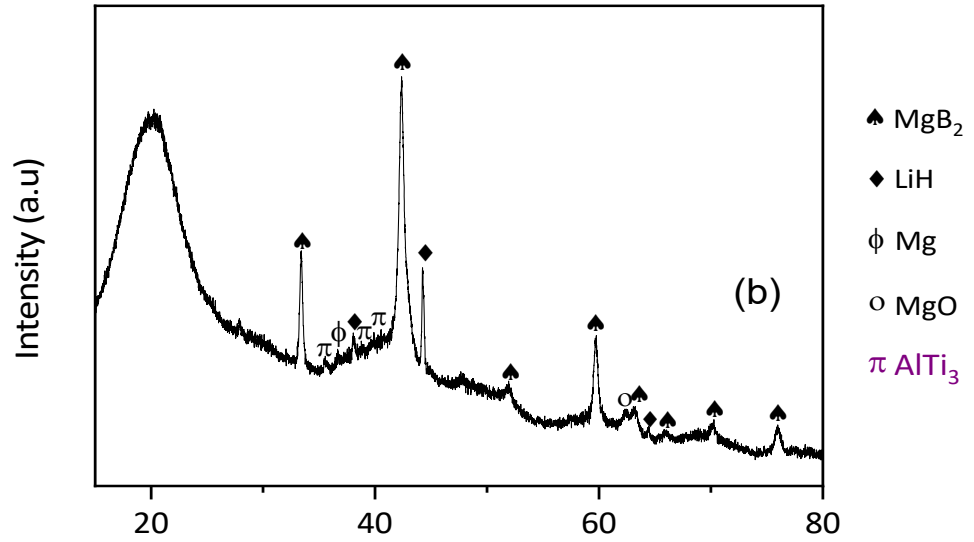

**Figure S3.** XRD diffractograms of Li-RHC + AlTi<sub>3</sub> sample after 4 cycles.

**Table S3.** Gas-solid reaction models and their integral expressions [36,68].

| Kinetic models                       |                                            | Description                                                                                             | Integral form<br>$g(\alpha) = k \times t$    | Rate equations to be used<br>for Sharp and Jone's method<br>( $t/t_{0.5}$ ) |
|--------------------------------------|--------------------------------------------|---------------------------------------------------------------------------------------------------------|----------------------------------------------|-----------------------------------------------------------------------------|
| Nucleation and<br>growth models      | Johnson-Mehl-<br>Avrami<br>(JMA, $n = 1$ ) | One-dimensional growth<br>with interface-controlled<br>reaction rate                                    | $[-\ln(1 - \alpha)^{1/n}]$                   | $[\frac{-\ln(1-\alpha)}{0.6931}]$                                           |
|                                      | Johnson-Mehl-<br>Avrami<br>(JMA, $n = 2$ ) | Two-dimensional growth of<br>the existent nuclei at<br>constant interface rate                          |                                              | $[\frac{-\ln(1-\alpha)^{1/2}}{0.832}]$                                      |
|                                      | Johnson-Mehl-<br>Avrami<br>(JMA, $n = 3$ ) | Three-dimensional growth<br>of random nuclei with<br>decreasing interface rate,<br>diffusion-controlled |                                              | $[\frac{-\ln(1-\alpha)^{1/3}}{8849}]$                                       |
| Diffusion models                     | 1-D Diffusion                              | Surface controlled<br>(Chemisorption)                                                                   | $\alpha^2$                                   | $\frac{\alpha^2}{0.25}$                                                     |
|                                      | 2-D Diffusion                              | Two-dimensional diffusion-<br>controlled growth with<br>decreasing interface rate                       | $(1 - \alpha) \ln(1 - \alpha) + \alpha$      | $\frac{(1 - \alpha) \ln(1 - \alpha) + \alpha}{0.1534}$                      |
|                                      | 3-D Diffusion                              | Three-dimensional<br>diffusion-controlled growth<br>with decreasing interface<br>rate                   | $1 - \frac{2}{3}\alpha - (1 - \alpha)^{2/3}$ | $\frac{1 - \frac{2}{3}\alpha - (1 - \alpha)^{2/3}}{0.04255}$                |
| Geometrical<br>contracting<br>models | Contracting area<br>(CA), $n = 2$          | Two-dimensional growth of<br>contracting volume with<br>constant interface rate                         | $1 - (1 - \alpha)^{1/n}$                     | $\frac{1 - (1 - \alpha)^{1/2}}{0.29289}$                                    |
|                                      | Contracting<br>volume (CV), $n = 3$        | Three-dimensional growth<br>of contracting volume with<br>constant interface rate                       |                                              | $\frac{1 - (1 - \alpha)^{1/3}}{0.20629}$                                    |

**Table S4.** Fitting parameters of the hydrogenation kinetic curves.

| Fitting model: CV ( $n = 3$ )<br>$f(\alpha) = 1 - (1 - k \times t)^{1/3}$ |           |                         |               |
|---------------------------------------------------------------------------|-----------|-------------------------|---------------|
| T (°C)                                                                    | k         | Sdt. Error              | Adj. R-Square |
| 380                                                                       | 0.0003242 | $3.09372 \cdot 10^{-6}$ | 0.9895        |
| 390                                                                       | 0.0004456 | $3.75844 \cdot 10^{-6}$ | 0.9911        |
| 400                                                                       | 0.0006388 | $6.53853 \cdot 10^{-6}$ | 0.9899        |
| 410                                                                       | 0.0008238 | $1.06936 \cdot 10^{-5}$ | 0.99877       |

**Table S5.** Fitting parameters of the dehydrogenation kinetic curves.

| Fitting model: JMA ( $n=1$ ) + Modified Prout Topkins<br>$f(\alpha) = A_1 \times (1 - \exp(-k_1 \times t)) + A_2 \times (1 + \exp[-(k_2 \times (t - t_0))^m])$ [50] |                |                |                |             |                |                         |                      |
|---------------------------------------------------------------------------------------------------------------------------------------------------------------------|----------------|----------------|----------------|-------------|----------------|-------------------------|----------------------|
| First step                                                                                                                                                          |                |                |                | Second step |                |                         |                      |
| T (°C)                                                                                                                                                              | R <sup>2</sup> | A <sub>1</sub> | k <sub>1</sub> | n           | A <sub>2</sub> | k <sub>2</sub>          | t <sub>0</sub>       |
| 370                                                                                                                                                                 | 0.9998         | 0.28279635     | 0.00529        | 1           | 0.81832835     | $1.08591 \cdot 10^{-4}$ | $4.32318 \cdot 10^4$ |
| 380                                                                                                                                                                 | 0.9999         | 0.26640137     | 0.00756        | 1           | 0.75455501     | $2.73158 \cdot 10^{-4}$ | $1.58231 \cdot 10^4$ |
| 390                                                                                                                                                                 | 0.9992         | 0.28851172     | 0.01162        | 1           | 0.79827248     | $5.51551 \cdot 10^{-4}$ | $6.98715 \cdot 10^3$ |
| 400                                                                                                                                                                 | 0.9993         | 0.27015373     | 0.01841        | 1           | 0.85972961     | 0.001045                | $3.56581 \cdot 10^3$ |
